# Supplementary material for: Tunable N-doped hollow carbon spheres induced by an ionic liquid for energy storage applications
Source: Royal Society of Chemistry journal article supplement (doi:10.1039/d0qm00839g), 2020-11-03
Supplement: d0qm00839g1.pdf [file d0qm00839g1.pdf]

## Supporting Information

### **Tunable N-doped hollow carbon spheres induced by ionic liquid for energy storage application**

Juan Du<sup>1</sup>, Lei Liu<sup>1</sup>, Haixia Wu<sup>1</sup>, Haijun Lv<sup>1</sup>, and Aibing Chen<sup>1,2</sup> \*

<sup>1</sup>College of Chemical and Pharmaceutical Engineering, Hebei University of Science and Technology, 70 Yuhua Road, Shijiazhuang 050018, China.

<sup>2</sup>CAS Key Laboratory of Carbon Materials, Institute of Coal Chemistry, Chinese Academy of Sciences.

\*E-mail: chen\_ab@163.com

#### **Experimental Section**

##### **Synthesis of N-HCS samples**

Resorcinol (0.215 g) was added quickly into the solution of 1-alkyl-3-methylimidazolium bromide ( $[\text{C}_{18}\text{Mim}]\text{Br}$ , 0.7 g) in  $\text{H}_2\text{O}$  (200 mL) and EtOH (100 mL) under vigorous stirring. Ethyl orthosilicate (TEOS, 2.15 mL) was added to the reaction mixture and subsequently stirred for 5 min and formaldehyde (37 wt%, 0.3 mL) was added. The mixed solution was subsequently

stirred at ambient temperature overnight. The as-synthesized suspension was centrifuged and dried at 70 °C overnight. For carbonization, the obtained product was heated at 800 °C for 3 h with a heating rate of 3 °C min<sup>-1</sup> under N<sub>2</sub> atmosphere. Finally, the N-HCS were obtained, after removing the silica with 10 wt% HF solution for 24 h. The EtOH/H<sub>2</sub>O ratios of 6/24, 10/20, 14/16, 16/14 and 20/10 are used to prepare N-HCS-6, N-HCS-10, N-HCS-14, N-HCS-16 and N-HCS-20 respectively.

### **Characterizations**

The morphology and microstructure of samples were investigated by transmission electron microscopy (TEM, JEOL JEM-2100). Nitrogen adsorption-desorption isotherms were carried out on a Micromeritics TriStar 3020 instrument at -196 °C. The Brunauer-Emmett-Teller (BET) method was employed to calculate the specific surface area, while the Barrett-Joyner-Halenda (BJH) method was applied to analyze the pore size distribution using the desorption branch of isotherm. The total pore volume was obtained from the amount of N<sub>2</sub> adsorbed at the relative pressure ( $P/P_0 = 0.97$ ). X-ray photoelectron spectroscopy (XPS) was conducted on a Thermo Scientific ESCALab 250Xi system using an Al-*K*α radiation under a vacuum of 3×10<sup>-10</sup> mbar. The composition of C, H and N content was evaluated using elemental analysis (CHN) on the Flash EA 1112.

### **Electrochemical Measurements**

The working electrode was prepared by coating the viscous slurry (samples, carbon black and polytetrafluoroethylene with the mass ratio of 8:1:1 in ethanol) onto Ni foam current collector. The mass of active material loaded on each working electrode was 4~5 mg after drying at 100 °C for 24 h. Electrochemical measurements were carried out in both three-electrode and two-electrode system using an electrochemical workstation (CHI 760E, Chenhua Instruments, China) with 6 M KOH solution as the electrolyte. For three-electrode system, a Pt wire and Hg/HgO was used as the counter and reference electrodes. For the fabrication of supercapacitor devices, two slices of electrode were immersed in 6 M KOH and were separated by a filtration

paper, then tested by the current collector. Electrochemical performances were evaluated by cyclic voltammetry (CV), galvanostatic charge-discharge (GCD) and electrical impedance spectroscopy (EIS) analysis. For the two-electrode system, the specific capacitances ( $C$ ,  $F\ g^{-1}$ ), energy density ( $E$ ,  $Wh\ kg^{-1}$ ) and power density ( $P$ ,  $W\ kg^{-1}$ ) were calculated by the following equations:  $C=4\ I\Delta t/\Delta Vm$ ,  $E=0.5\ C(\Delta V)^2/4/3.6$  and  $P=3600\ E/\Delta t$ , where  $I$  (A),  $\Delta t$  (s),  $\Delta V$  (V) and  $m$  (g) are GCD current, discharge time, voltage window, and mass of active material, respectively. In three-electrode system, the specific gravimetric capacitance according to the GCD measurements:  $C=I\Delta t/\Delta Vm$ .

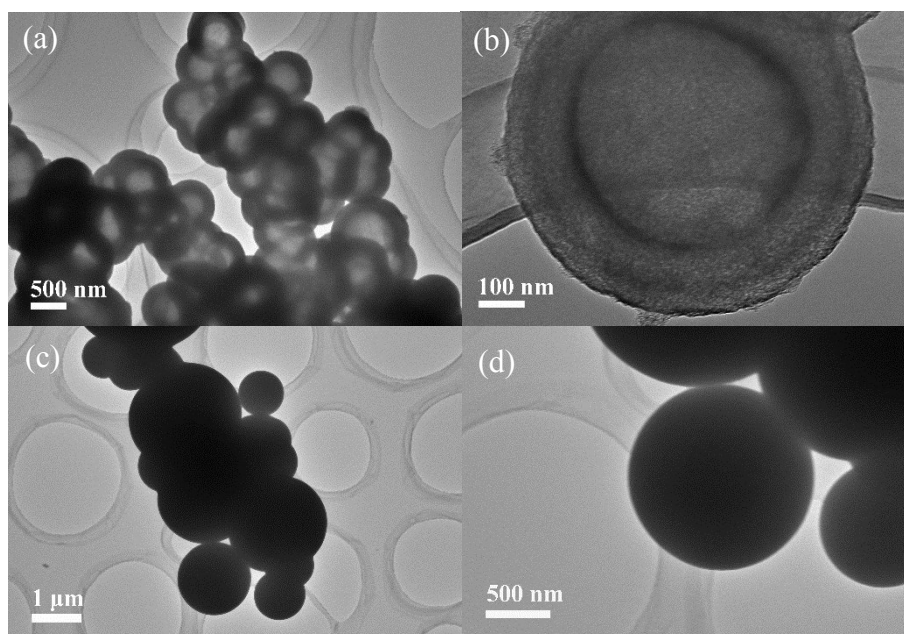

**Fig. S1.** TEM images of N-HCS-16 (a, b) and N-HCS-20 (c, d).

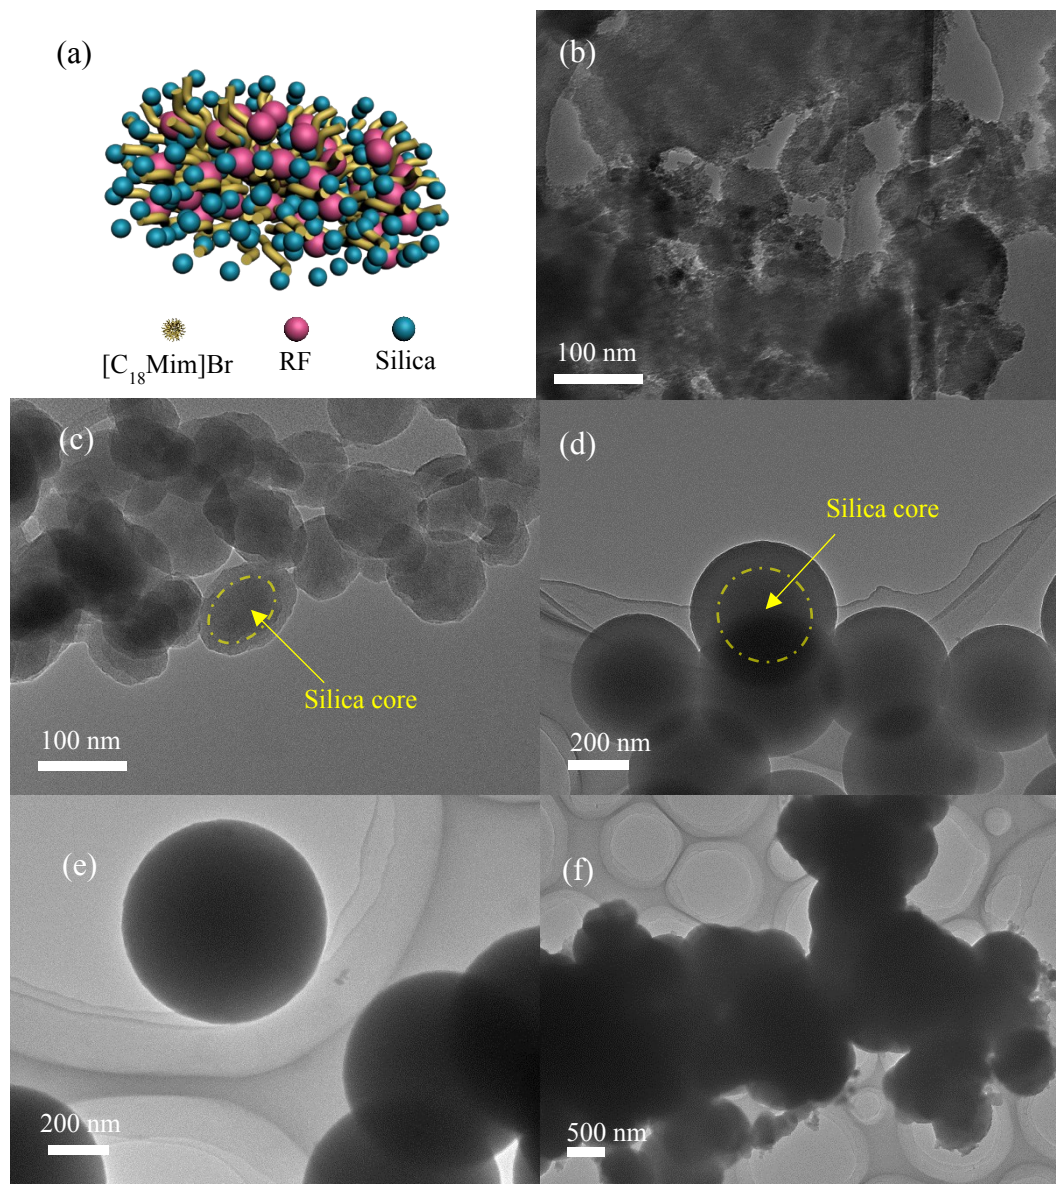

**Fig. S2.** Model of hybridization of silica/resin (a) and TEM images of hybridization of silica/resin precursor of N-HCS-6 (b), N-HCS-10 (c), N-HCS-14 (d), N-HCS-16 (e) and N-HCS-20 (f).

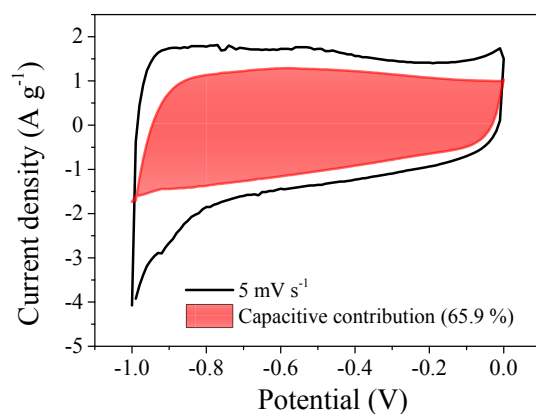

**Fig. S3.** Capacitive contribution of N-HCS-14 to the total charge storage at  $5 \text{ mV s}^{-1}$ .

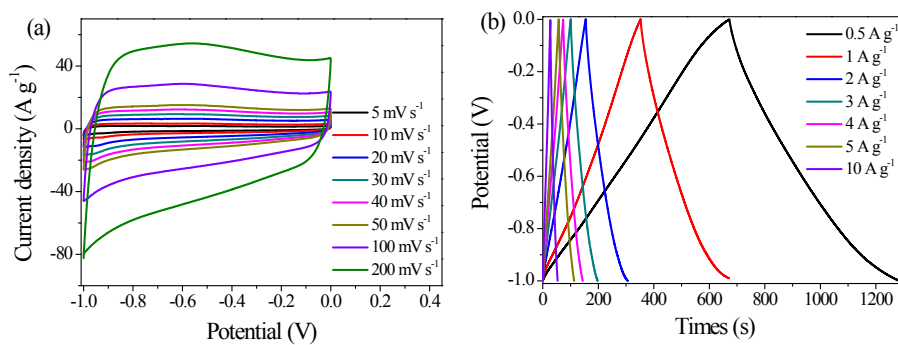

**Fig. S4.** CV curves at different scan rates (a), GCD curves at different current densities (b) of N-HCS-14 in three-electrode system.

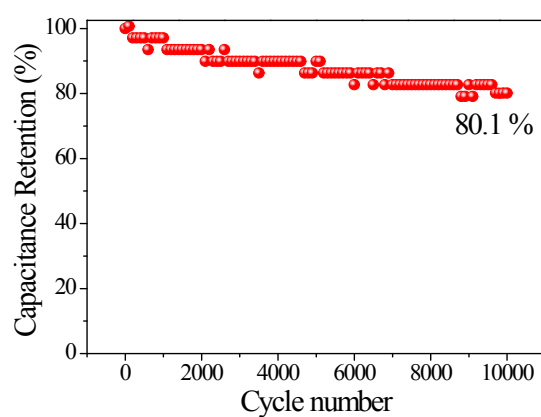

**Fig. S5.** Cycle test of N-HCS-14 in current density of  $2 \text{ A g}^{-1}$  in two-electrode system.
